# Supplementary material for: Association between Self-Reported Prior Night’s Sleep and Single-Task Gait in Healthy, Young Adults: A Study Using Machine Learning
Source: MDPI journal article supplement (doi:10.3390/s22197406), 2022-09-29
Supplement: s1 [file s1]

**Supplementary Table S1:** Complete set of gait variables

| Variable (units)                        |
|-----------------------------------------|
| <i>Lower Limb Variables</i>             |
| Mean cadence (step/min)                 |
| Cadence variance (%)                    |
| Mean toe out angle (deg)                |
| Variance mean toe out angle (%)         |
| Mean foot strike angle (deg)            |
| Variance foot strike angle (%)          |
| Mean circumduction (cm)                 |
| Variance circumduction (%)              |
| Mean stride length (m)                  |
| Variance stride length (%)              |
| Mean step variability                   |
| Mean mid-swing elevation (cm)           |
| Variance mid-swing elevation (%)        |
| Mean double leg support (%GCT)          |
| Asymmetries double leg support (%)      |
|                                         |
| <i>Upper Limb Variables</i>             |
| Mean upper arm ROM (deg)                |
| Variance upper arm ROM (%)              |
|                                         |
| <i>Turning Variables</i>                |
| Mean turn angle (degrees)               |
| Mean steps in turn (#)                  |
| Mean turn velocity (degrees/s)          |
|                                         |
| <i>Anticipatory Postural Adjustment</i> |
| Forward APA Peak (m/s <sup>2</sup> )    |
| Lateral APA Peak (m/s <sup>2</sup> )    |
| First Step Range of Motion (deg)        |
| APA Duration (s)                        |
|                                         |
| <b>Trunk</b>                            |
| Neck – Mean Sagittal ROM (degrees)      |
| Neck - Mean Coronal ROM (degrees)       |
| Neck - Mean Transverse ROM (degrees)    |
| Back - Mean Sagittal ROM (degrees)      |
| Back - Mean Coronal ROM (degrees)       |

Back - Mean Transverse ROM (degrees)

Abbreviations: APA = anticipatory postural adjustment; GCT = ground contact time; ROM = range of motion
